# Supplementary material for: Kinetic study of the reaction between an antitumor 15N labeled trans-platinum iminoether complex and GMP by [1H, 15N] HMQC NMR
Source: Royal Society of Chemistry journal article supplement (doi:10.1039/b203572n), 2002-01-01
Supplement: b203572n.doc [file b203572n.doc]

**Supplementary material**


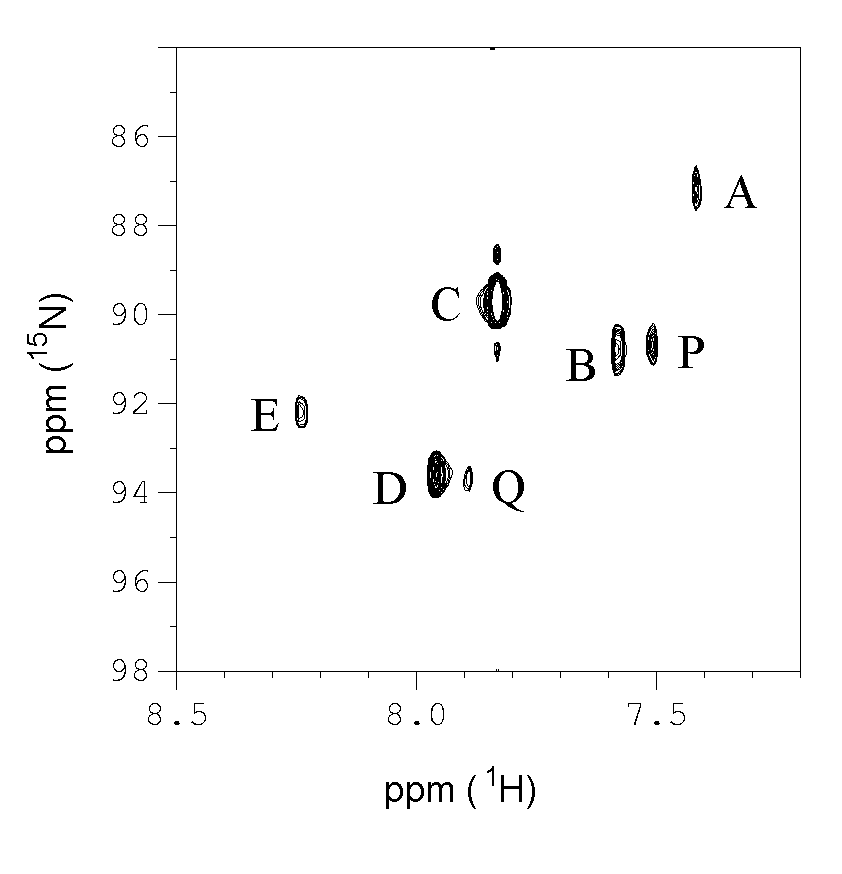


**Figure S1** 2D 1H 15N HMQC NMR spectrum from the reaction between 0.9 mM 15N *trans-EE* and 2.2 mM GMP for 6 hours at 298 K in the presence of 20 mM phosphate buffer. Two extra peaks (P and Q) appear in this spectrum, which were not present in the reaction performed without phosphate buffer. They are assigned to phosphate adducts *trans-EE* (Cl, PO4) (peak P) and *trans-EE* (GMP, PO4) (peak Q). The phosphate adduct peaks appear nearby the aqua species peaks having the same set of donor atoms.


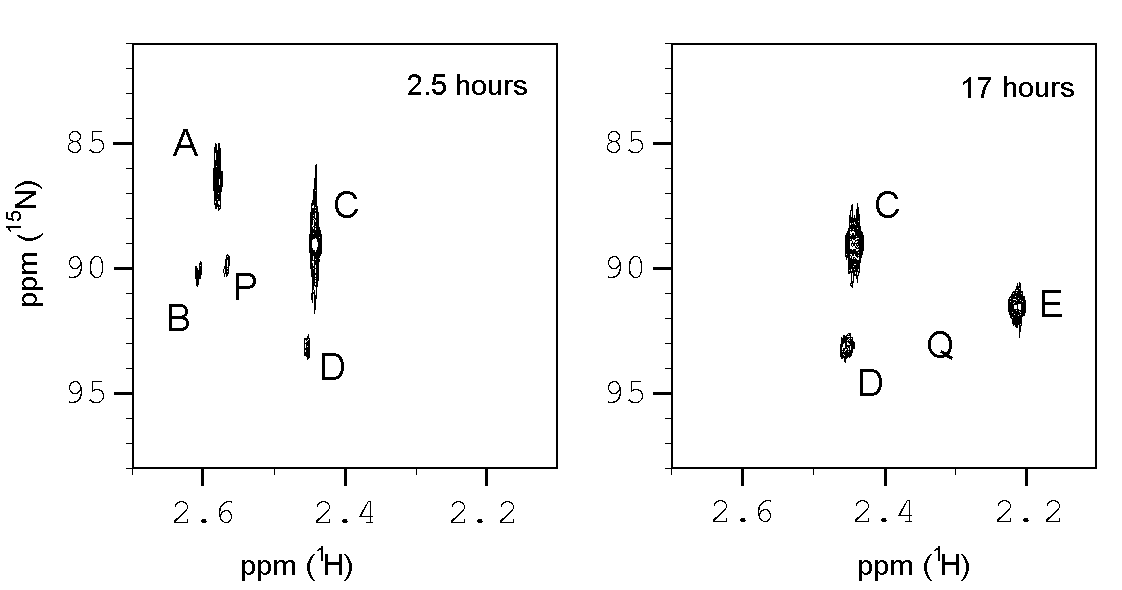


**Figure S2** HMBC NMR spectra of reaction between *trans-EE* and GMP. Reaction time labeled in figure. These spectra show the correlations between 15N and methyl 1H chemical shifts. Comparison between these HMBC spectra and the 1H chemical shifts reported in a previous work15, provides additional support to the peak assignments made in this context.

# Equations S1

Differential equations for the reactions between *trans-EE* and GMP according to Scheme 2:

d[A]  dt = -*k*1  [A] + *k*-1  [B]  [Cl-]

d[B]  dt = *k*1  [A] - *k*-1  [B]  [Cl-] - *k*3  [B][GMP]

d[C]  dt = *k*3  [B][GMP] - *k*4  [C] + *k*-4  [D]  [Cl-]

d[D]  dt = *k*4  [C] - *k*-4  [D]  [Cl-] – *k*5  [D][GMP]

d[E]  dt = *k*5  [D][GMP]

d[GMP]  dt= -*k*3  [B][GMP] - *k*5  [D][GMP]

[Cl-] = 2[A0] – 2[A] – [B] – [C]


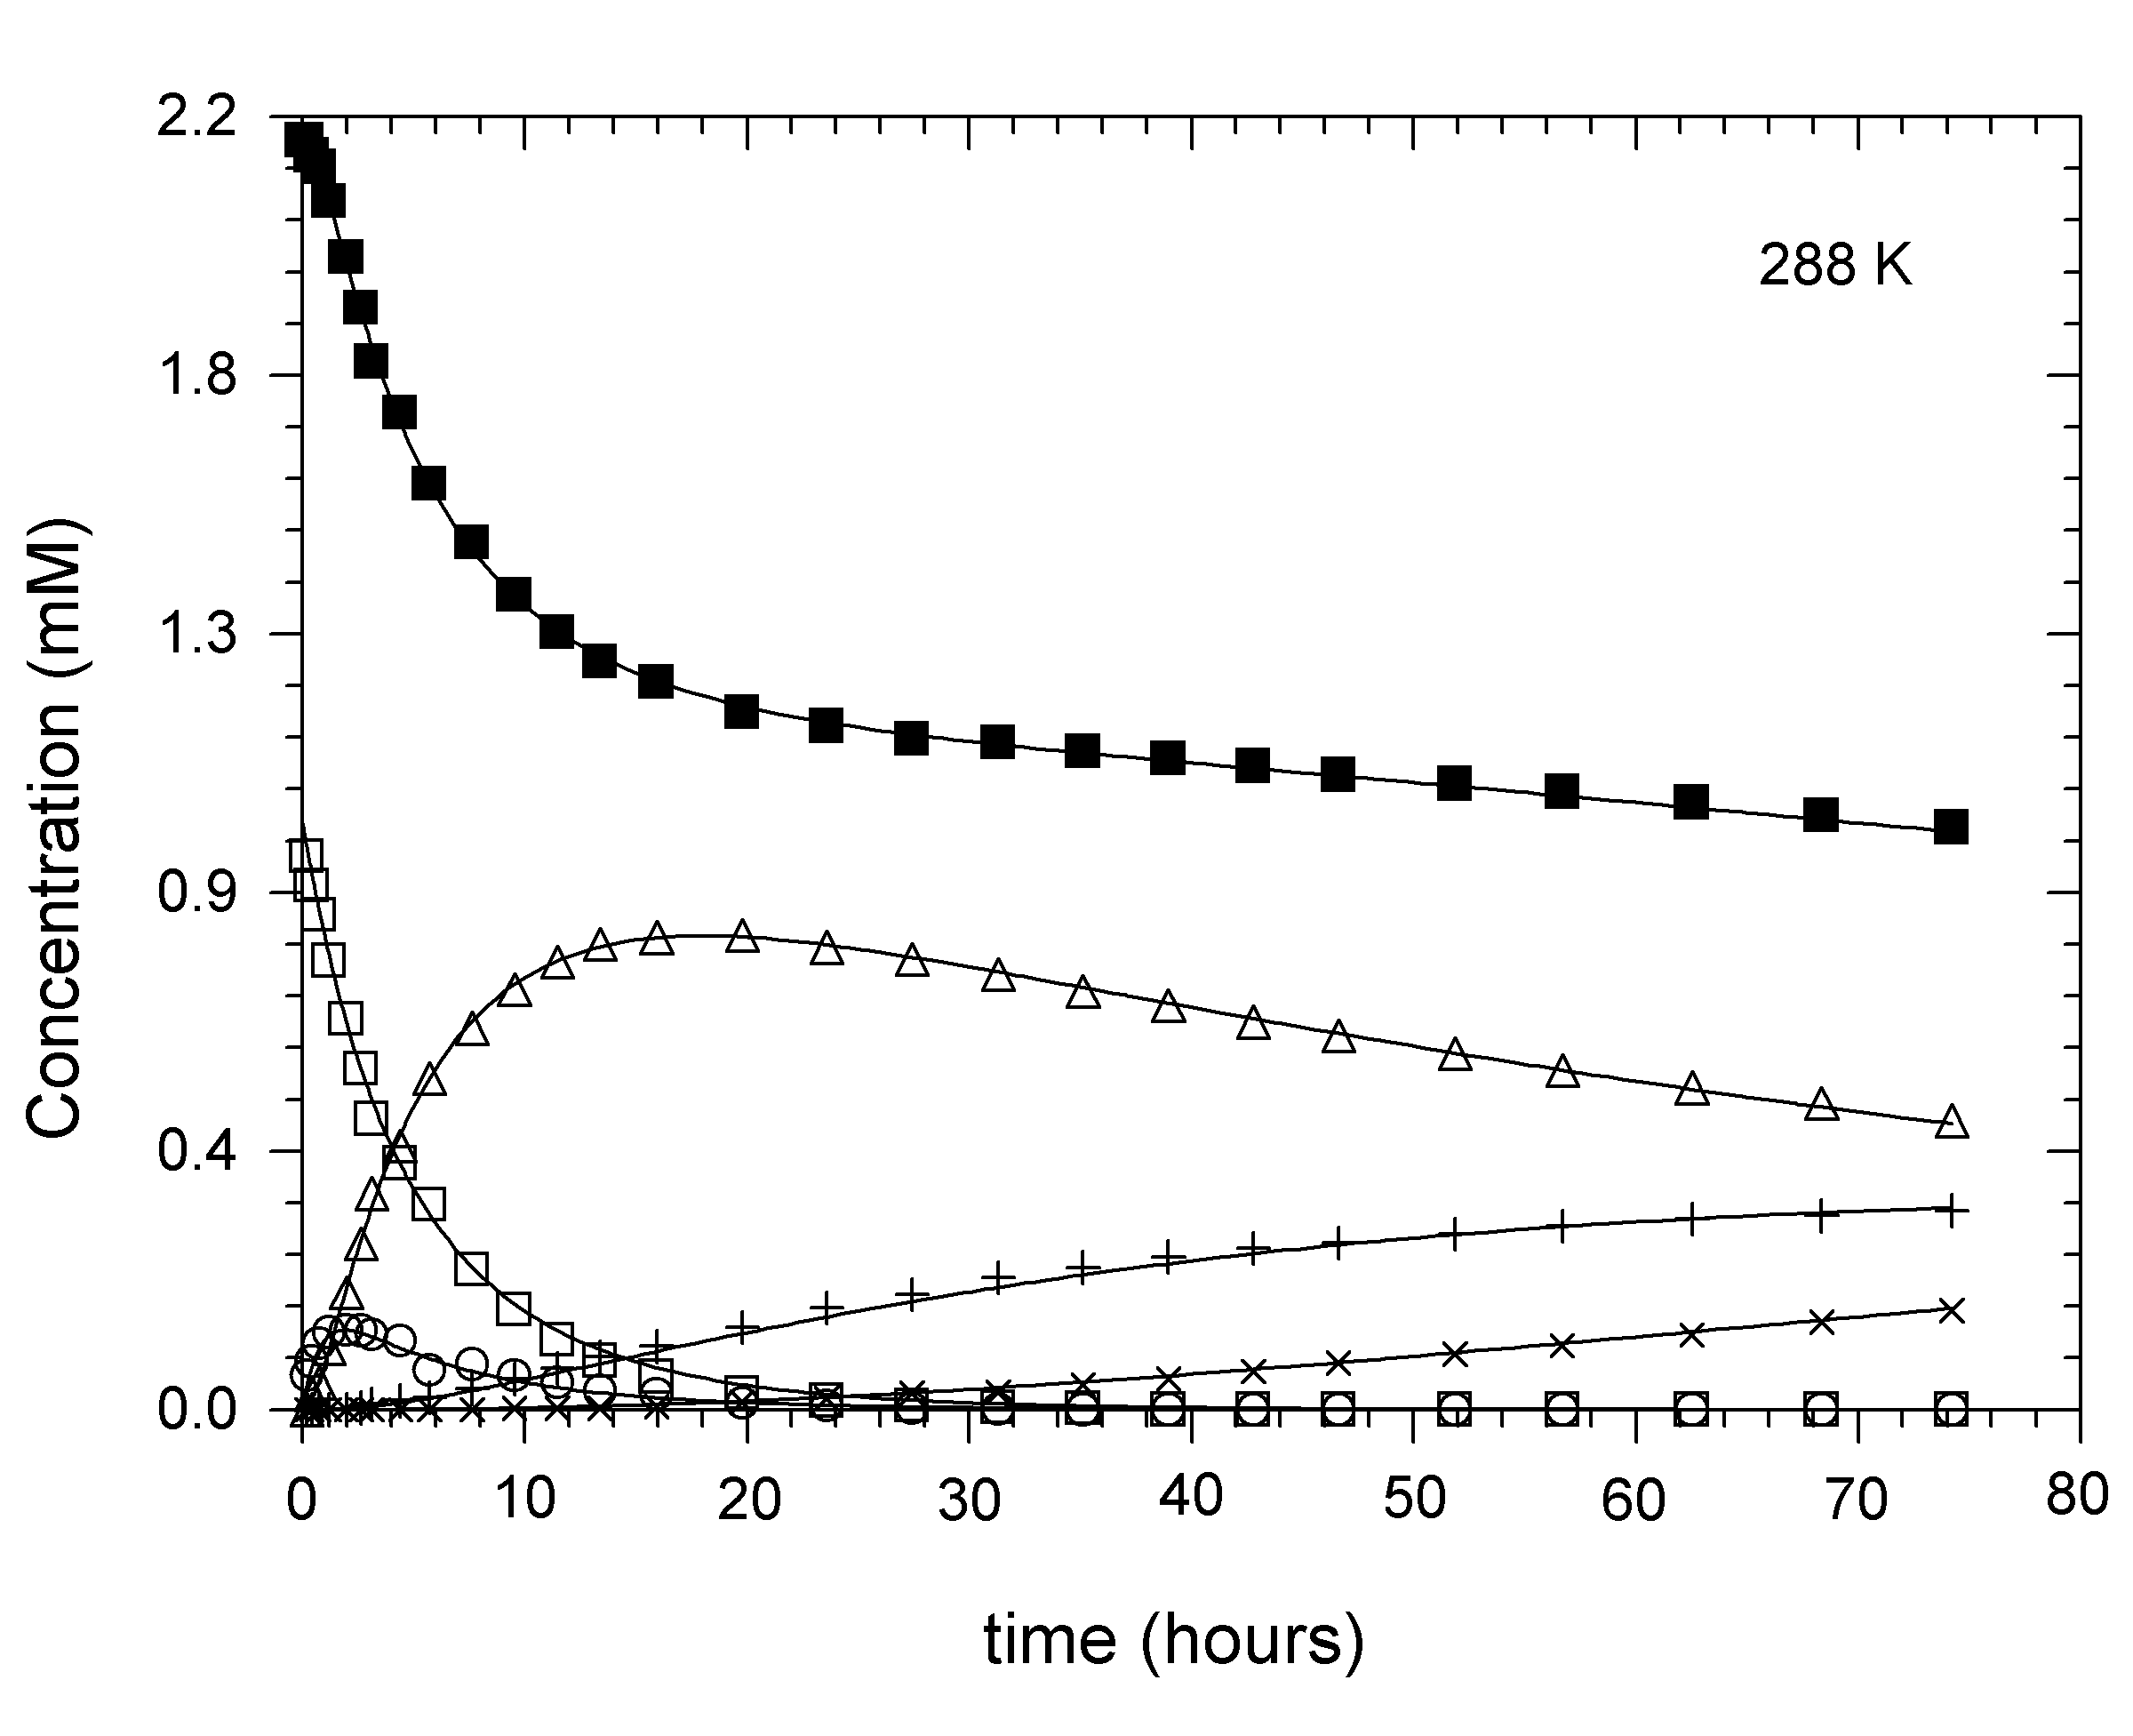

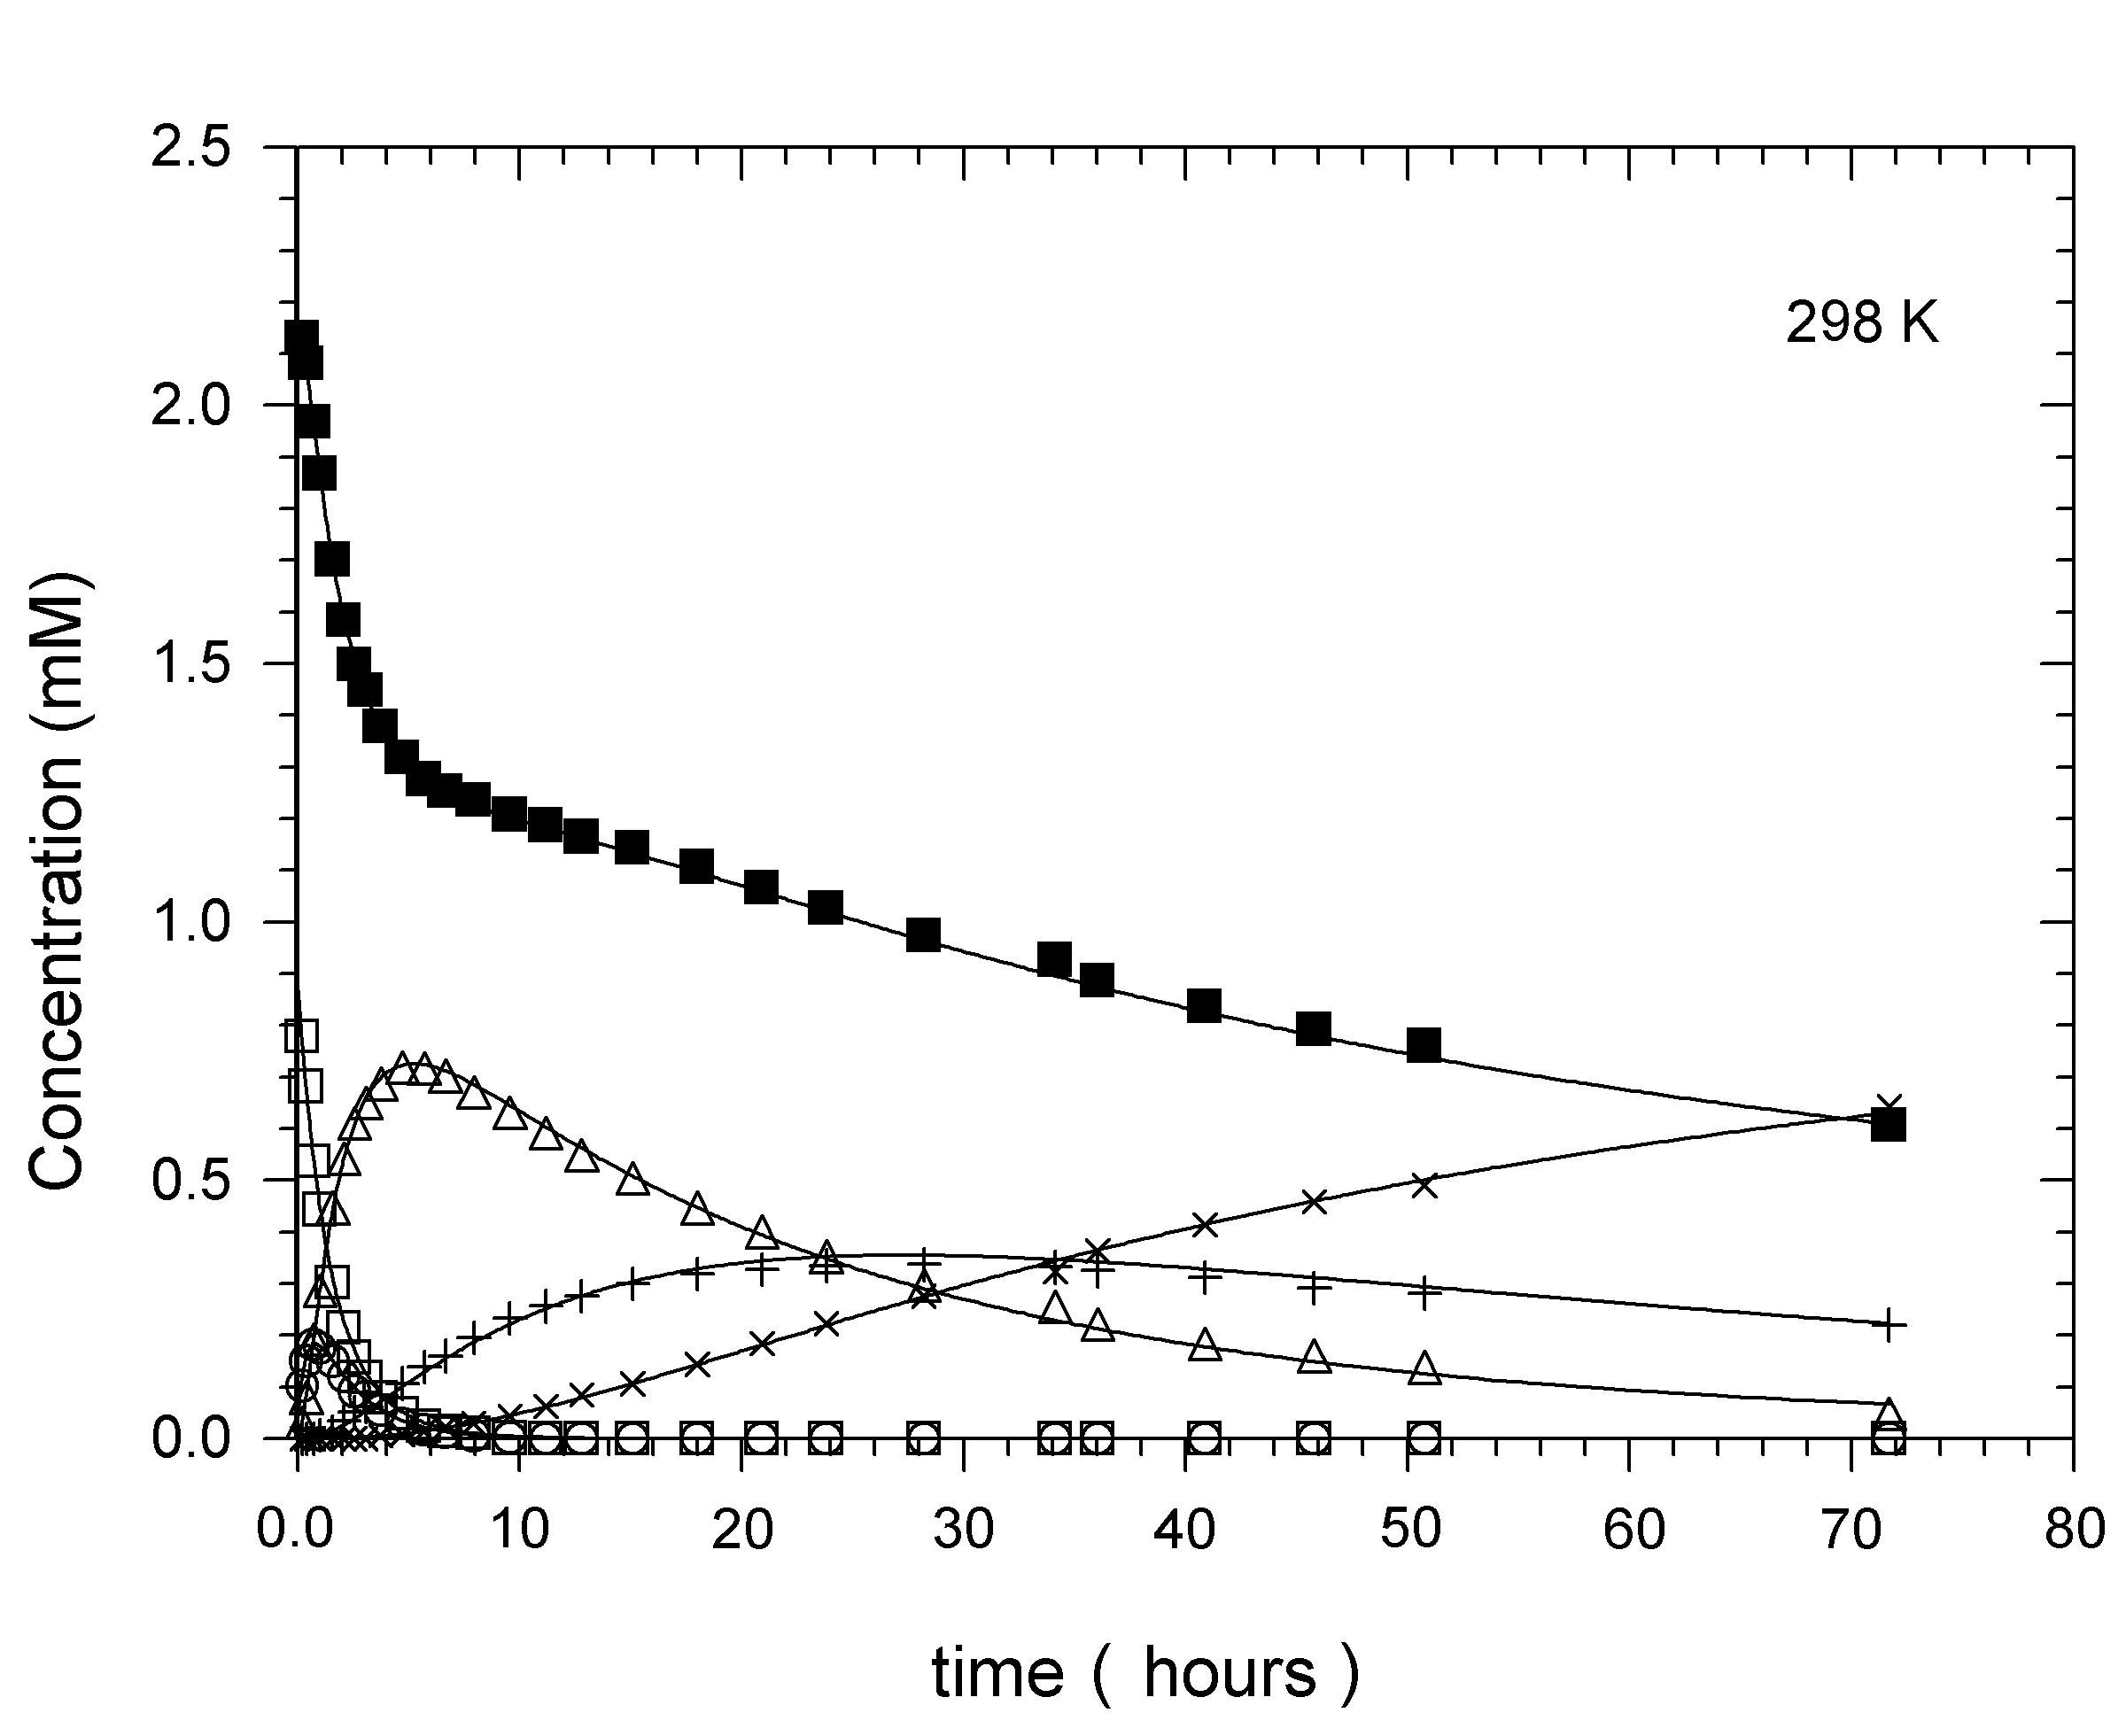


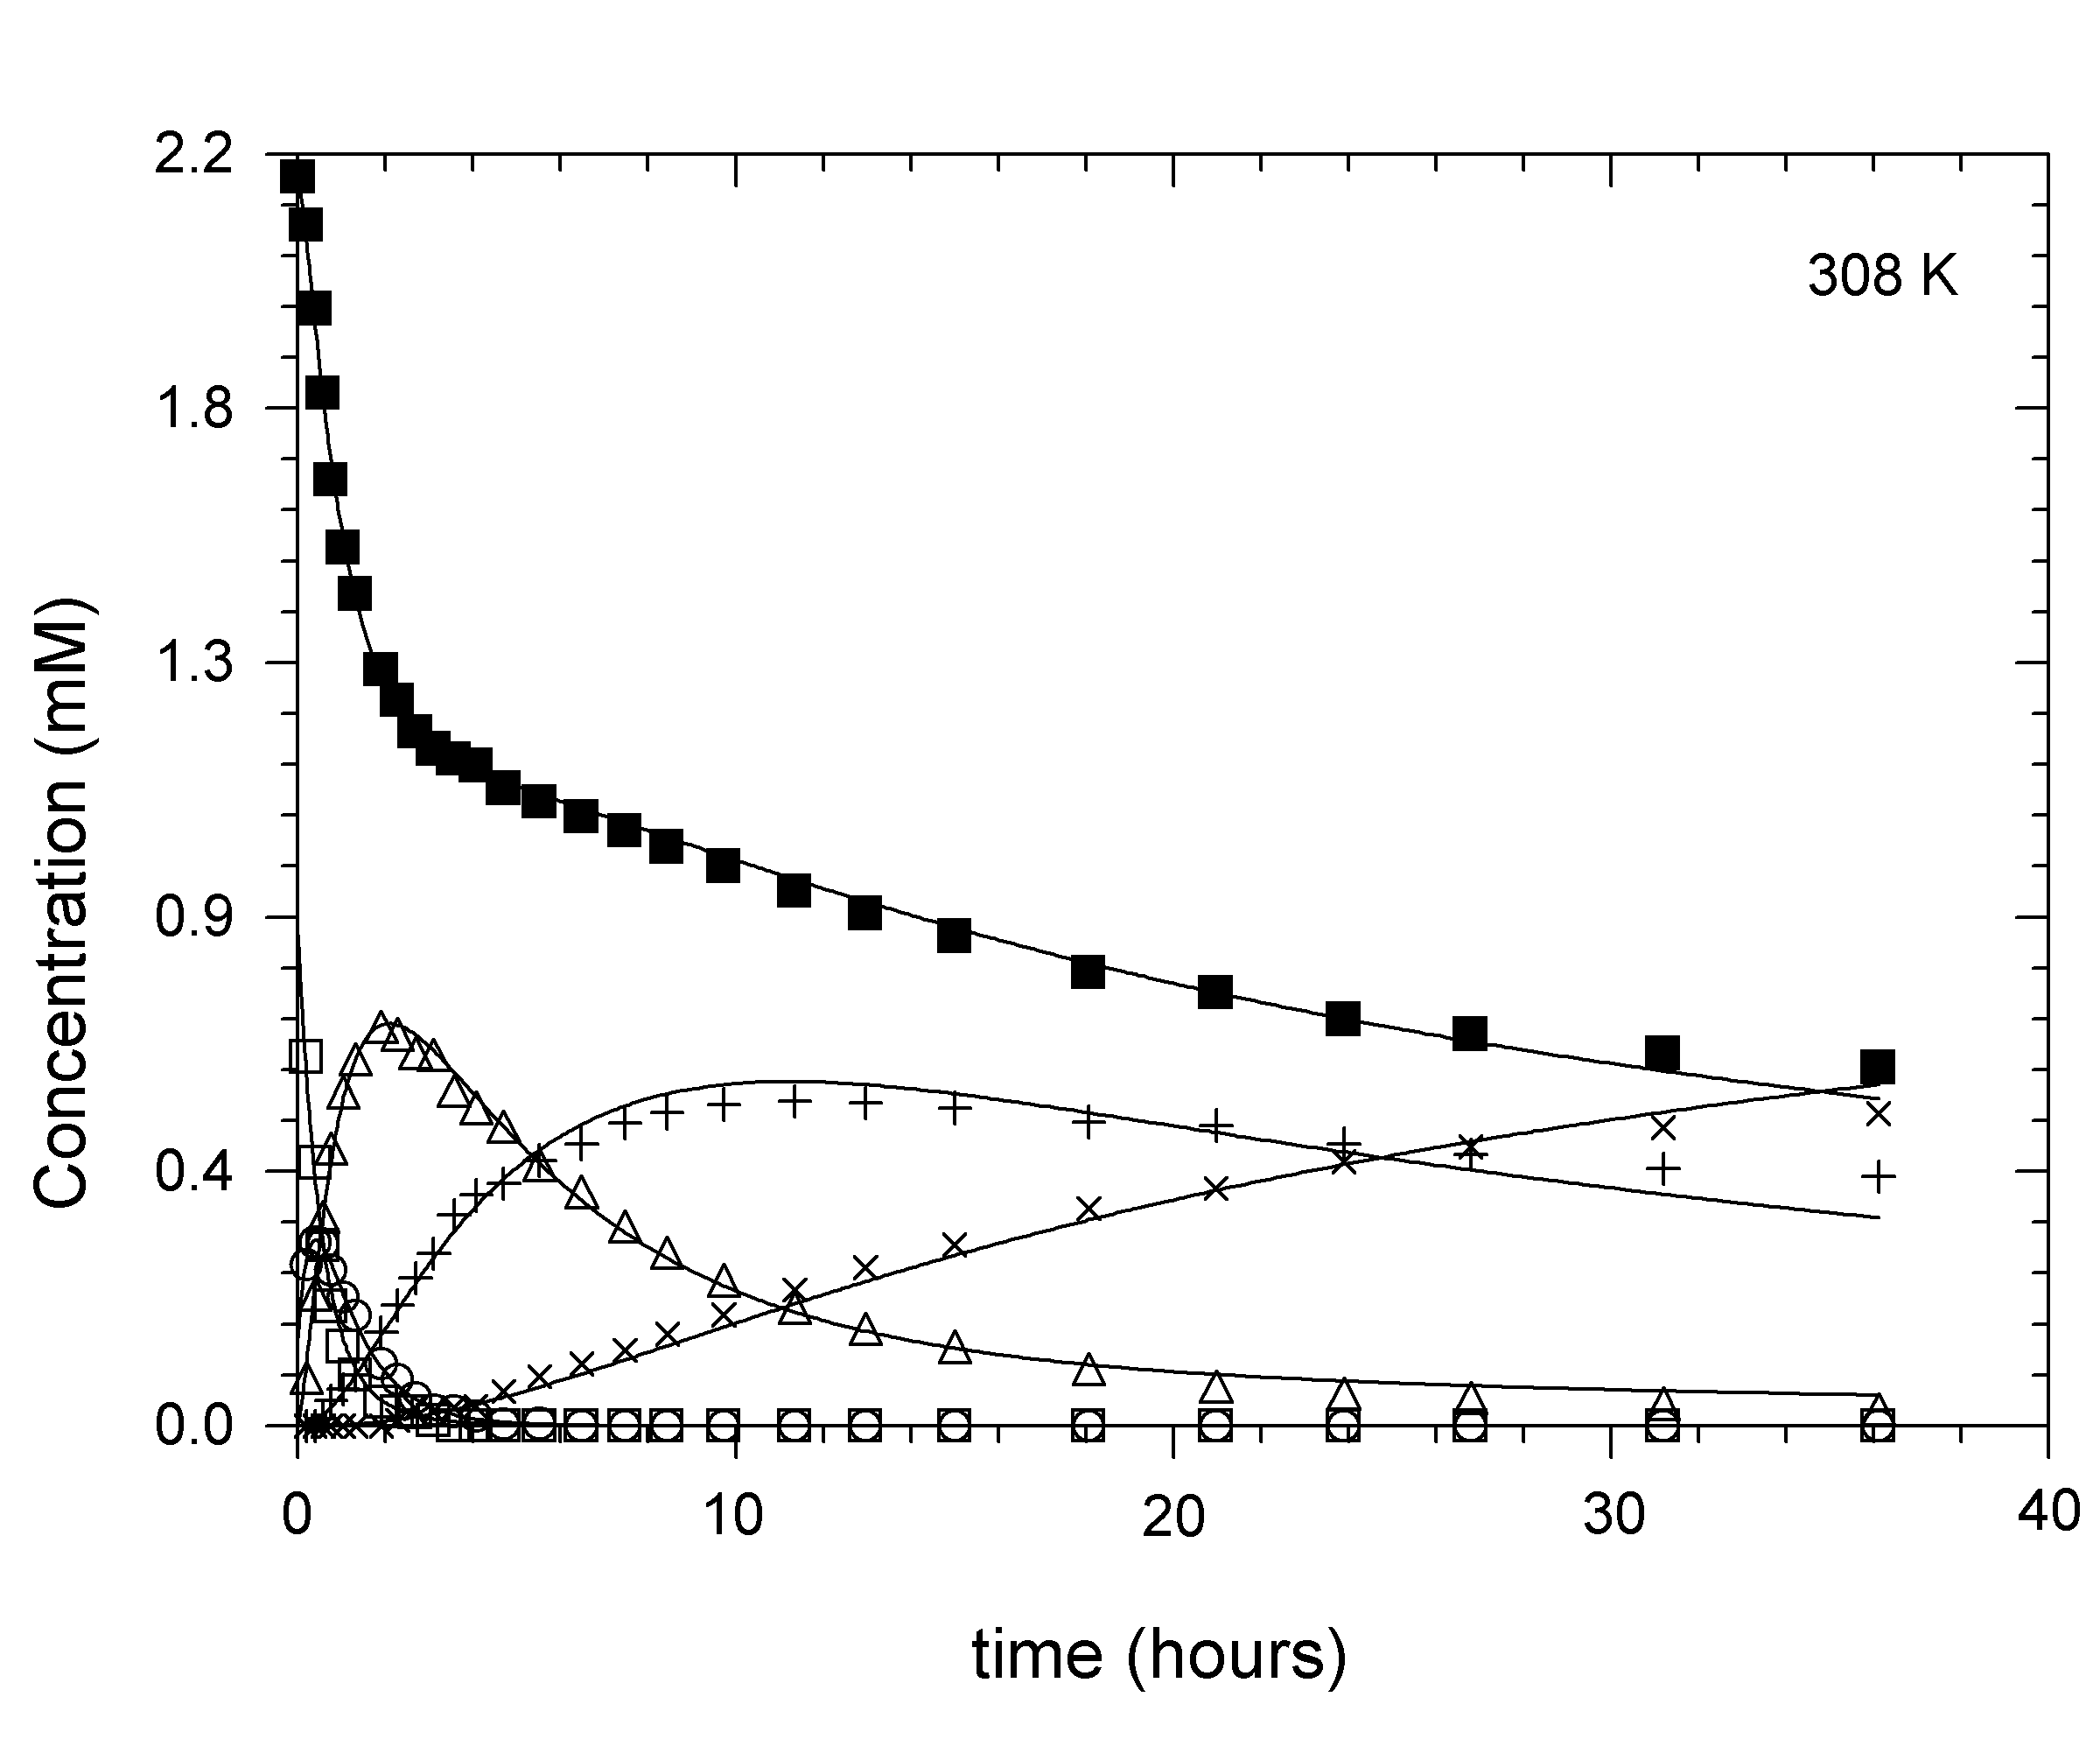

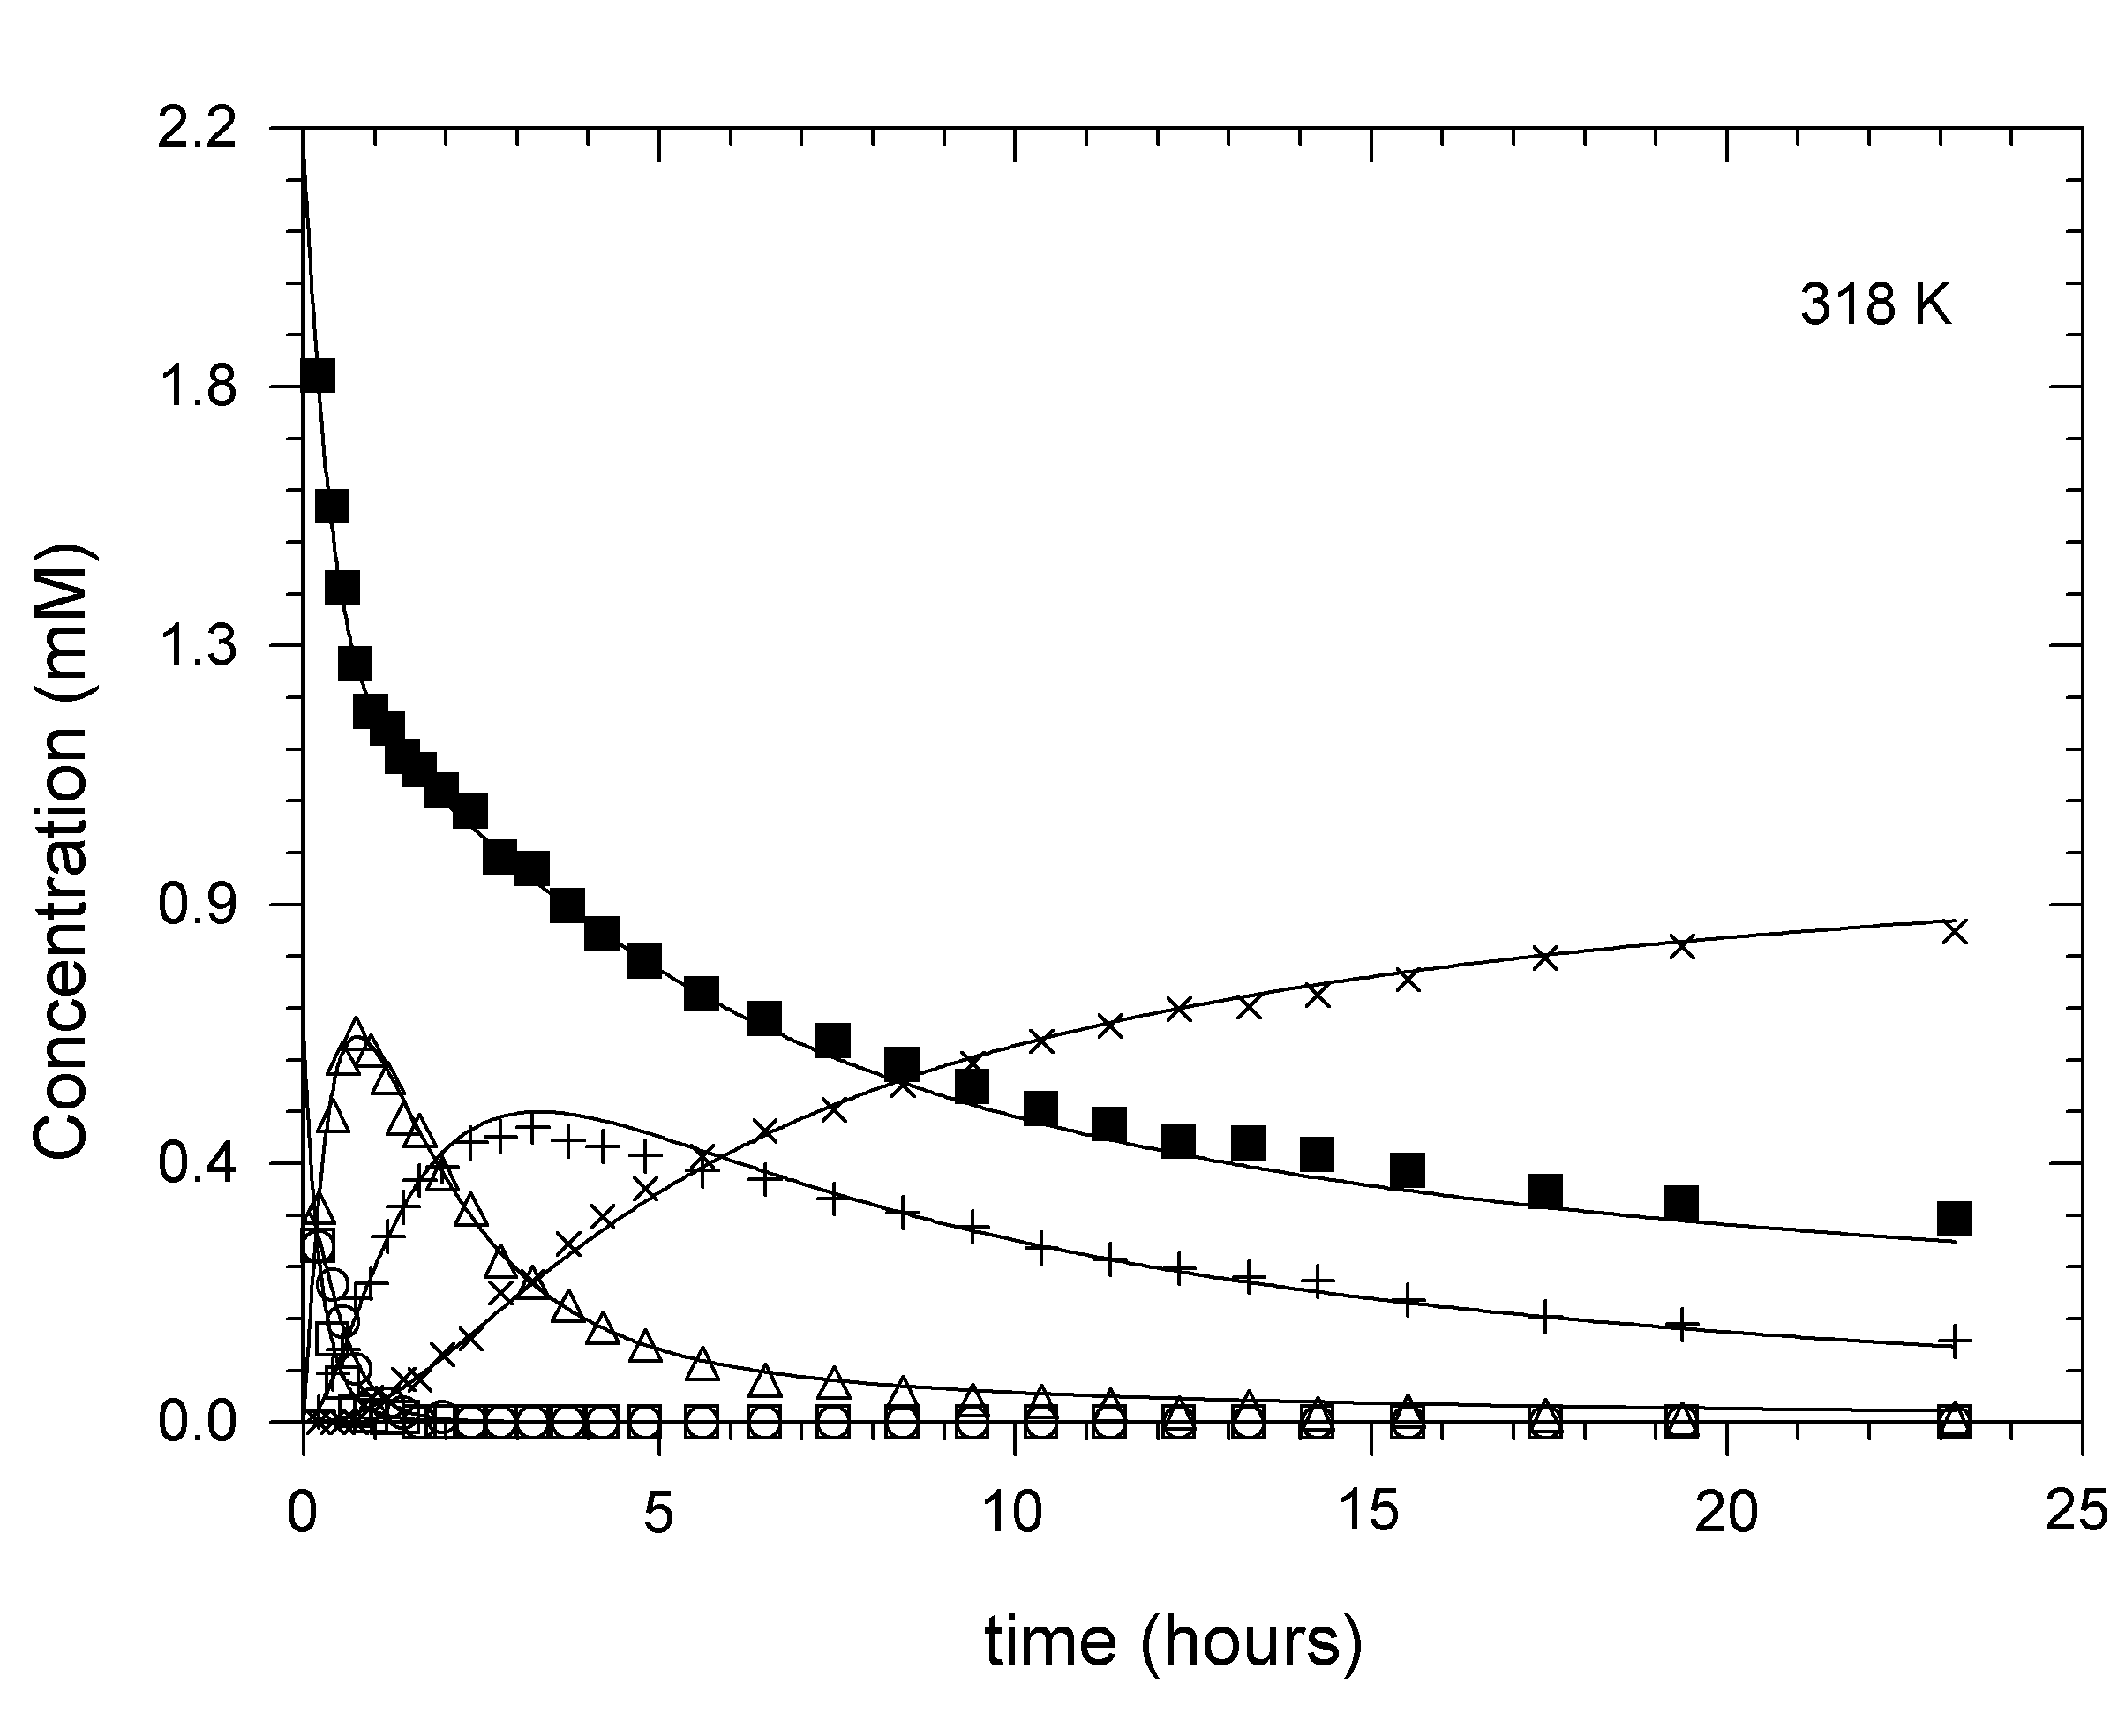


**Figure S3** Calculated curves and experimental NMR points for the time course of the reactions between *trans-EE* and GMP at various temperatures. Symbols represent experimental data of: (■) GMP, (□) *trans*-*EE* (Cl2), (o) *trans*-*EE* (Cl, H2O), (∆) *trans-EE* (Cl, GMP), (+) *trans-EE* (H2O, GMP), () *trans-EE* (GMP)2.

**Figure S4** Plots of the total concentration of *trans-EE* (Cl, GMP) plus *trans-EE* (H2O, GMP) *vs*. reaction time at 298 K. (a) 0.9 mM *trans-EE* + 2.2 mM GMP, (b) 0.9 mM *trans-EE* + 7.2 mM GMP, (c) 0.36 mM *trans-EE* + 2.2 mM GMP*.*

Table S

|  | GMP (mM) | *trans-EE* (mM) | V1 (10-9 Ms-1) | V2 (10-9 Ms-1) |
| --- | --- | --- | --- | --- |
| a | 2.2 | 0.9 | 76 | 2.9 |
| b | 7.2 | 0.9 | 114 | 6.5 |
| c | 2.2 | 0.36 | 32 | 1.6 |

V1: Reaction rate (average value within the first half life) for formation of mono- adducts, derived from the decrease with time of the total concentration of *trans-EE* (Cl2) plus *trans-EE* (H2O, Cl).

V2: Reaction rate (average value within the first half life) for formation of bis-adducts derived from decrease with time of the total concentration of *trans-EE* (Cl, GMP) plus *trans-EE* (H2O, GMP).


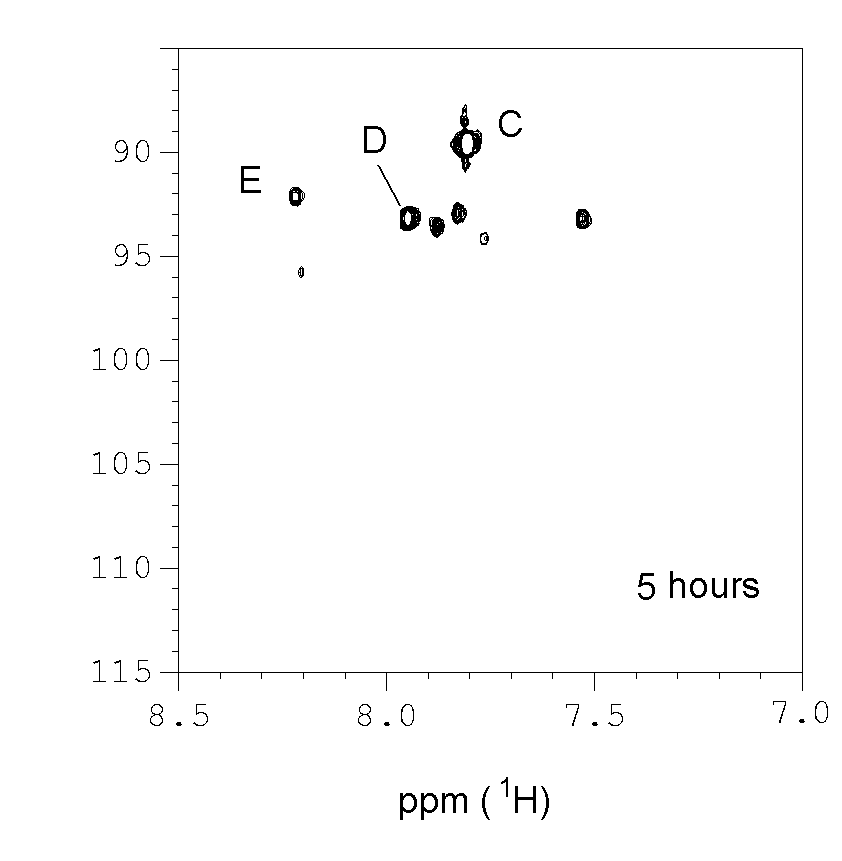


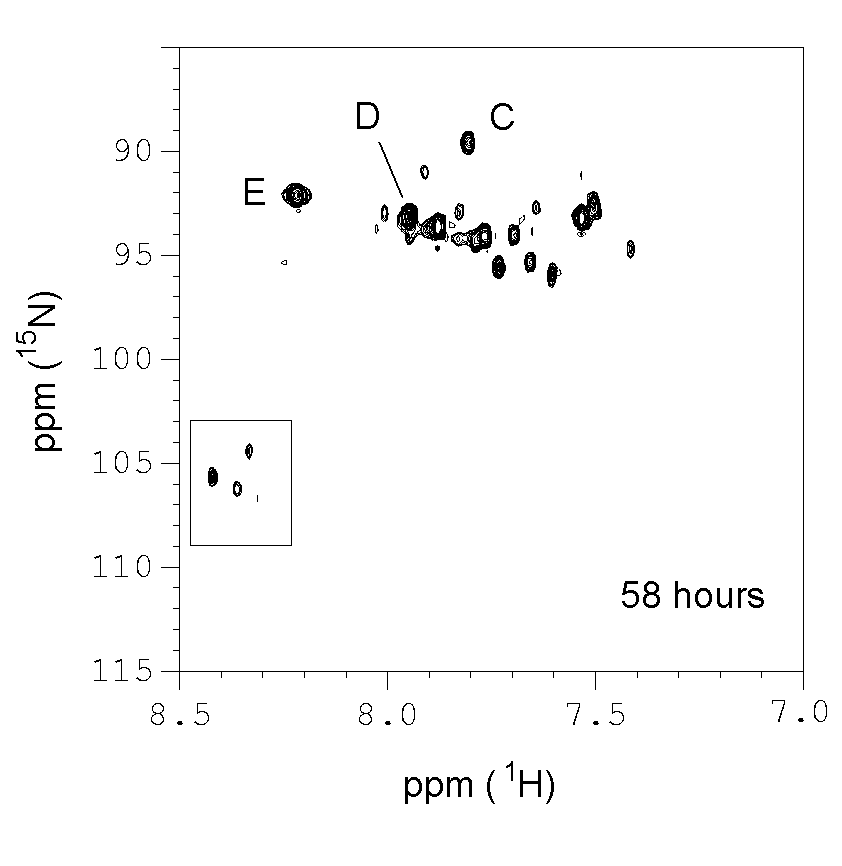


**Figure S5** 2D [1H 15N] HMQC spectra for reaction of purified *trans-EE* (Cl, GMP) (adduct C in Scheme 2) with GSH. The peaks in the small box are probably from sulfur binding adducts.

**Figure S6**. Competition between GMP and GSH for reaction with *trans-EE*. Experimental points extracted from 2D [1H 15N] HMQC spectra like those shown in Figure 8 in the paper. (□) *trans*-*EE* (Cl2), (o) *trans*-*EE* (Cl, H2O), (▼) *trans-EE* (Cl, GMP), (▲) *trans-EE* (GMP)2, *trans*-*EE*/GSH adducts (∆, ◊ and ). Several minor adducts containing GSH or GSH and GMP are labeled as () with dotted lines. The lines between the points are drawn for clarity.
